# Supplementary material
Source: bioRxiv or medRxiv preprint supplement (https://www.biorxiv.org/highwire/filestream/27606/field_highwire_adjunct_files/0/097626-1.pdf)
Supplement: Supplementary file [file 097626-1.pdf]

## Supplementary material

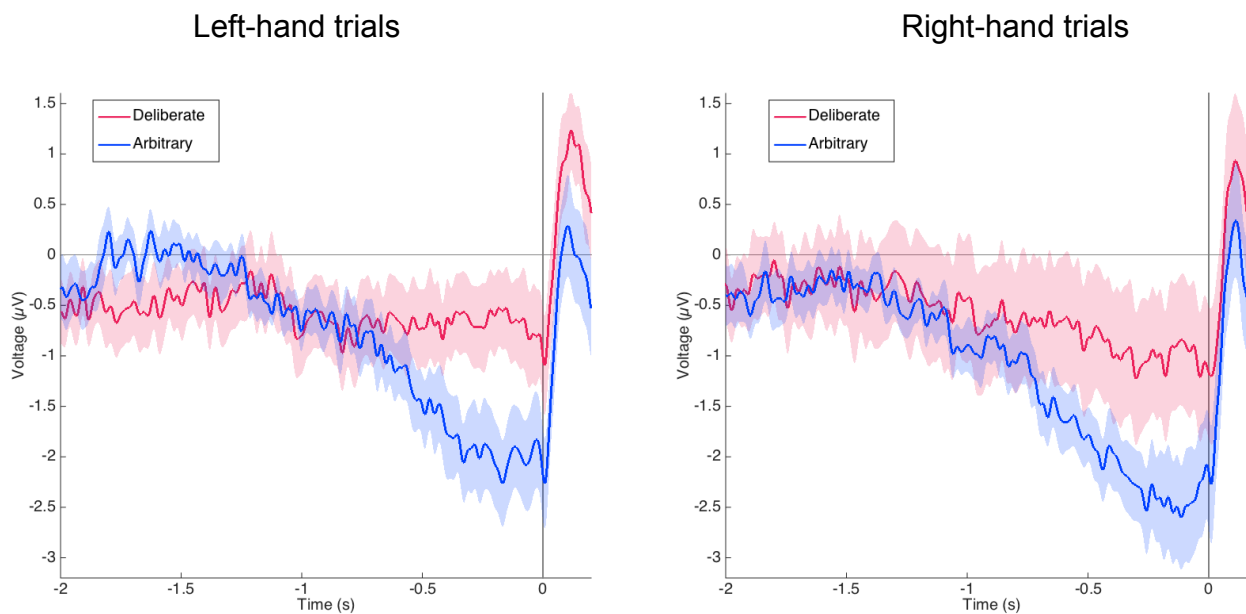

Figure S1: The RP for trials where subjects moved their left hand (left panel) and their right hand (right panel) separately. Dividing the trials into left-hand and right-hand ones results in only half the number of trials per subject, compared with Fig. 3. So, easy and hard decisions were pooled together to get back to approximately the same number of trials. Notably, the main pattern of results persists for each type of trials (right/left responses), where an RP is found for arbitrary decisions only.

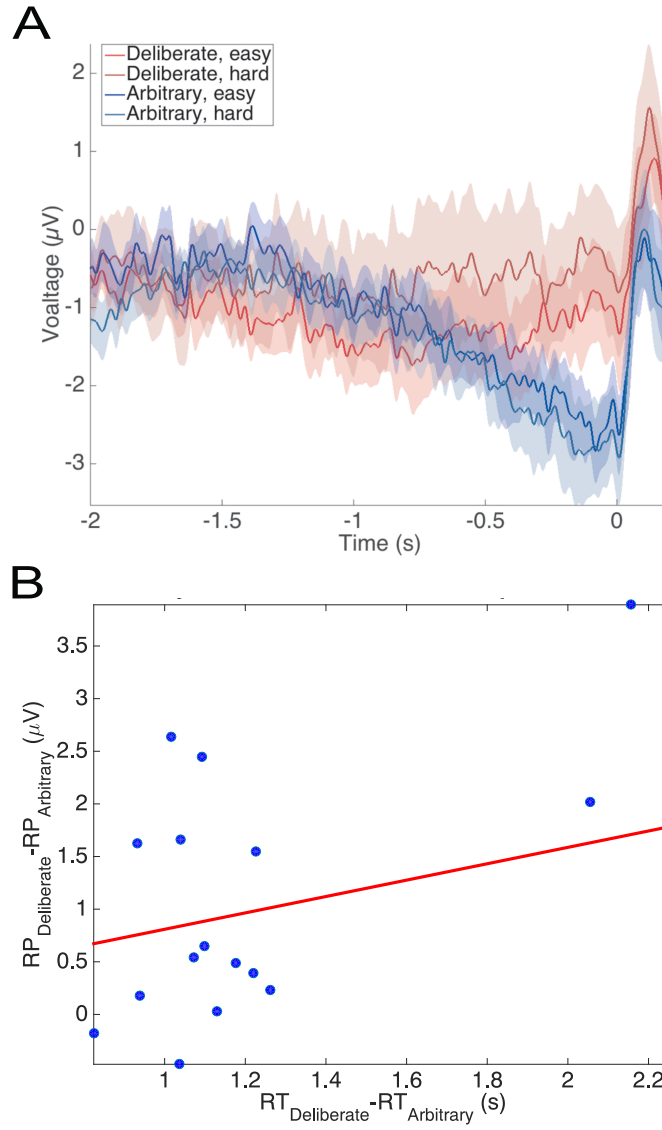

Figure S2: (A) The subjects with above-median RTs for arbitrary decisions (in blue) and below-median RTs for deliberate decisions (in red), show the same pattern that was found in the main analysis (Fig. 3). (B) A regression of the difference between the RPs versus the difference between the RTs for deliberate and arbitrary decisions for each subject. The equation of the regression line is  $y = 0.78 [CI -0.69, 2.25] x + 0.03 [CI -1.93, 2.00]$ . The  $R^2$  is low at 0.08 and, as the confidence intervals suggest, the slope is not significantly different from 0 ( $F(1,17)=1.48, p=0.28$ ). One subject, #7, had an RT difference between deliberate and arbitrary decisions that was more than 6 interquartile ranges (IQRs) away from the median difference across all subjects. That same subject's RT difference was also more than 5 IQRs higher than the 75<sup>th</sup> percentile across all subjects. That subject was therefore designated an outlier<sup>1</sup> and removed from the regression analysis.

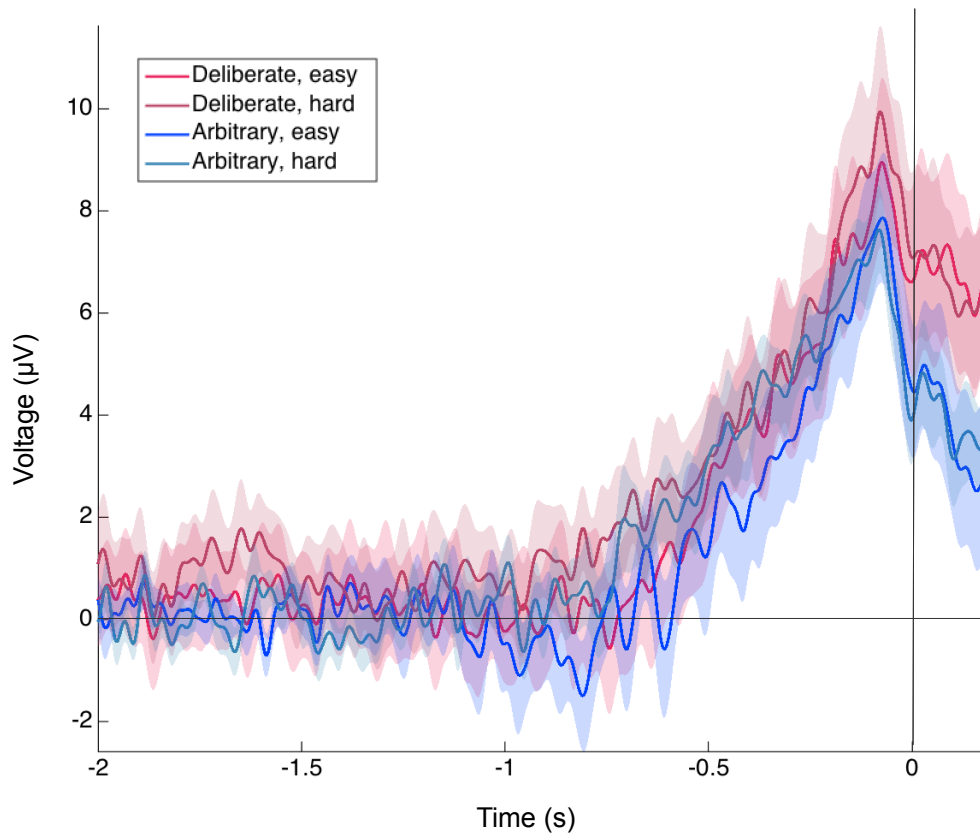

Figure S3: The lateralized readiness potential (LRP) for deliberate and arbitrary, easy and hard decisions. No difference was found between the conditions (all  $F_s < 1$ ).

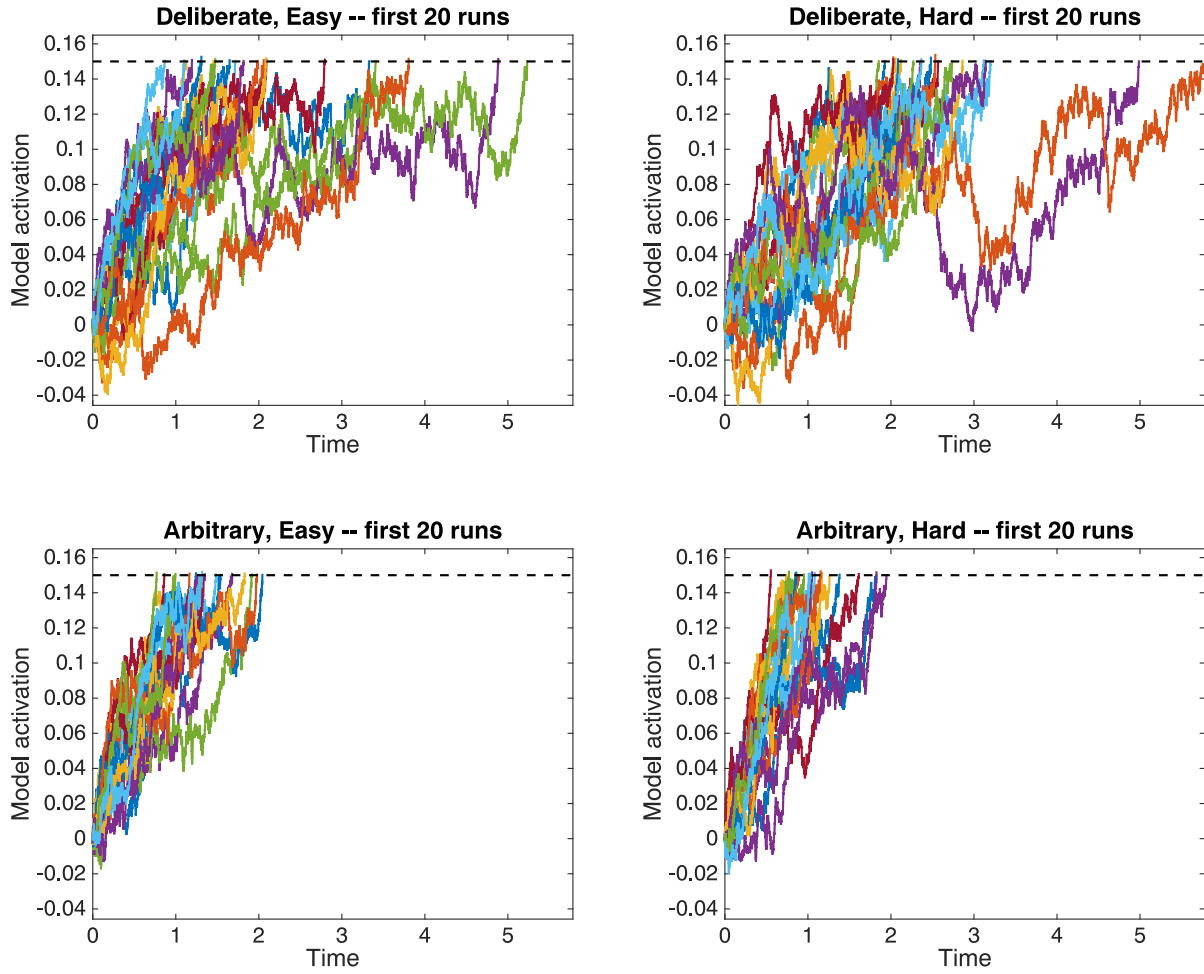

Figure S4: The first 20 model runs for all four decision conditions. The integration threshold, at 0.15, is designated by a dashed line in all decision conditions. Here  $t = 0$  s designates the beginning of the model's run.

**Table S1: NPO names and causes acronyms**

| <b>NPO</b>                                                              | <b>Cause acronym</b>                | <b>NPO website</b>                                                                                                                                    |
|-------------------------------------------------------------------------|-------------------------------------|-------------------------------------------------------------------------------------------------------------------------------------------------------|
| <b>Consensual NPOs</b>                                                  |                                     |                                                                                                                                                       |
| American Society on Aging                                               | Pro Quality of Life for the Elderly | <a href="http://asaging.org/">http://asaging.org/</a>                                                                                                 |
| Conservation Fund                                                       | Pro Environment protection'         | <a href="http://www.conservationfund.org/">http://www.conservationfund.org/</a>                                                                       |
| Bill & Melinda Gates Foundation                                         | Pro Education                       | <a href="http://www.gatesfoundation.org/">http://www.gatesfoundation.org/</a>                                                                         |
| Global Fund for Women                                                   | Pro Women's Rights                  | <a href="https://www.globalfundforwomen.org/">https://www.globalfundforwomen.org/</a>                                                                 |
| The Hunger Project                                                      | Pro Hunger Relief                   | <a href="https://www.thp.org/">https://www.thp.org/</a>                                                                                               |
| Oxfam International                                                     | Pro Poverty & Disaster Relief       | <a href="http://www.oxfam.org/">http://www.oxfam.org/</a>                                                                                             |
| World Wild Life Fund (WWF)                                              | Pro Species Conservation            | <a href="http://worldwildlife.org/">http://worldwildlife.org/</a>                                                                                     |
| Cancer Research Institute                                               | Pro Cancer Research                 | <a href="http://www.cancerresearch.org/">http://www.cancerresearch.org/</a>                                                                           |
| Habitat for Humanity                                                    | Pro Housing for All                 | <a href="http://www.habitat.org/">http://www.habitat.org/</a>                                                                                         |
| Reading is Fundamental                                                  | Pro Advancement of Literacy         | <a href="http://www.rif.org/">http://www.rif.org/</a>                                                                                                 |
| International Institute for Conservation of Historic and Artistic Works | Pro Culture & Arts Preservation     | <a href="https://www.iiconservation.org/">https://www.iiconservation.org/</a>                                                                         |
| Big Brothers and Big Sisters of America                                 | Pro Youth Development               | <a href="http://www.bbbs.org/site/c.9iILI3NGKKhK6F/b.5962335/k.BE16/Home.htm">http://www.bbbs.org/site/c.9iILI3NGKKhK6F/b.5962335/k.BE16/Home.htm</a> |
| United Nations Children's Fund (UNICEF)                                 | Pro Child Protection                | <a href="http://www.unicef.org/">http://www.unicef.org/</a>                                                                                           |
| Doctors without Borders (Medecins sans frontieres)                      | Pro Disaster Medical Care           | <a href="http://www.msf.org/">http://www.msf.org/</a>                                                                                                 |
| Soldiers' Angels                                                        | Pro Veterans & Military             | <a href="http://www.soldiersangels.org/heroes/index.php">http://www.soldiersangels.org/heroes/index.php</a>                                           |
| Disability Rights International                                         | Pro Disabilities Rights             | <a href="http://www.disabilityrightsintl.org/">http://www.disabilityrightsintl.org/</a>                                                               |

|                                          |                                    |                                                                                                       |
|------------------------------------------|------------------------------------|-------------------------------------------------------------------------------------------------------|
| National Crime Prevention Council (NCPC) | Pro Crime Prevention               | <a href="http://www.ncpc.org/">http://www.ncpc.org/</a>                                               |
| Amnesty International                    | Pro Human Rights                   | <a href="https://www.amnesty.org/">https://www.amnesty.org/</a>                                       |
| Peace Corps                              | Pro Peace & Development            | <a href="http://www.peacecorps.gov/">http://www.peacecorps.gov/</a>                                   |
| World Health Organization                | Pro World Health                   | <a href="http://www.who.int/en/">http://www.who.int/en/</a>                                           |
| <b>Controversial NPOs</b>                |                                    |                                                                                                       |
| Planned Parenthood                       | Pro Abortion & Family Planning     | <a href="http://www.plannedparenthood.org/">http://www.plannedparenthood.org/</a>                     |
| Pro-Life Alliance                        | Anti Abortion & Family Planning    | <a href="http://www.prolifealliance.com/">http://www.prolifealliance.com/</a>                         |
| Human Rights Campaign                    | Pro LBGTQ Rights                   | <a href="http://www.hrc.org/">http://www.hrc.org/</a>                                                 |
| National Organization for Marriage       | Anti LBGTQ Rights                  | <a href="https://www.nationformarriage.org/">https://www.nationformarriage.org/</a>                   |
| Stem for Life Foundation                 | Pro Stem Cell Research             | <a href="http://www.stemforlife.org/">http://www.stemforlife.org/</a>                                 |
| Christian Dental & Medical Association   | Anti Stem Cell Research            | <a href="http://www.cmda.org/">http://www.cmda.org/</a>                                               |
| Greenpeace                               | Pro Action Against Climate Change  | <a href="http://www.greenpeace.org/international/en/">http://www.greenpeace.org/international/en/</a> |
| Global Climate Scam                      | Anti Action Against Climate Change | <a href="http://www.globalclimatescam.com/">http://www.globalclimatescam.com/</a>                     |
| National Association for Gun Rights      | Pro Gun Rights                     | <a href="http://www.nationalgunrights.org/">http://www.nationalgunrights.org/</a>                     |
| Coalition to Stop Gun Violence           | Pro Gun Control                    | <a href="http://csgv.org/">http://csgv.org/</a>                                                       |
| American Gas Association                 | Pro Fracking for Natural Gas       | <a href="http://www.aga.org/Pages/default.aspx">http://www.aga.org/Pages/default.aspx</a>             |
| Americans Against Fracking               | Anti Fracking for Natural Gas      | <a href="http://www.americansagainstfracking.org/">http://www.americansagainstfracking.org/</a>       |
| StandWithUs (Israel)                     | Pro Israel                         | <a href="http://www.standwithus.com/">http://www.standwithus.com/</a>                                 |
| Palestinian Centre for Human Rights      | Pro Palestine                      | <a href="http://www.pchrgaza.org/portal/en/">http://www.pchrgaza.org/portal/en/</a>                   |
| National Organization for                | Pro Marijuana Legalization         | <a href="http://norml.org/">http://norml.org/</a>                                                     |

|                                                                  |                                        |                                                                                                             |
|------------------------------------------------------------------|----------------------------------------|-------------------------------------------------------------------------------------------------------------|
| the Reform of Marijuana Laws                                     |                                        |                                                                                                             |
| Citizens Against Legalizing Marijuana                            | Anti Marijuana Legalization            | <a href="http://www.calmca.org/">http://www.calmca.org/</a>                                                 |
| Understanding Animal Research                                    | Pro Scientific Experiments on Animals  | <a href="http://www.understandinganimalresearch.org.uk/">http://www.understandinganimalresearch.org.uk/</a> |
| International Association Against Painful Experiments on Animals | Anti Scientific Experiments on Animals | <a href="http://www.iaapea.com/">http://www.iaapea.com/</a>                                                 |
| Federation for American Immigration Reform                       | Pro Immigration Reform                 | <a href="http://www.fairus.org/">http://www.fairus.org/</a>                                                 |
| American Immigration Control                                     | Anti Immigration Reform                | <a href="http://www.immigrationcontrol.com/">http://www.immigrationcontrol.com/</a>                         |
| Human Cloning Foundation                                         | Pro Human Cloning                      | <a href="http://www.humancloning.org/">http://www.humancloning.org/</a>                                     |
| Americans to Ban Cloning                                         | Anti Human Cloning                     | <a href="http://www.cloninginformation.org/">http://www.cloninginformation.org/</a>                         |
| Americans United for Separation of Church and State              | Pro Separation of Church & State       | <a href="https://www.au.org/">https://www.au.org/</a>                                                       |
| Christian Coalition of America                                   | Anti Separation of Church & State      | <a href="http://www.cc.org">http://www.cc.org</a>                                                           |
| Death with Dignity National Center                               | Pro Euthanasia (Assisted Suicide)      | <a href="http://www.deathwithdignity.org/">http://www.deathwithdignity.org/</a>                             |
| Euthanasia Prevention Coalition                                  | Anti Euthanasia (Assisted Suicide)     | <a href="http://www.epcc.ca/">http://www.epcc.ca/</a>                                                       |
| The Alliance for Better Foods                                    | Pro Genetically Modified Foods         | <a href="http://www.betterfoods.org/">http://www.betterfoods.org/</a>                                       |
| Non-GMO Project                                                  | Anti Genetically Modified Foods        | <a href="http://www.nongmoproject.org/">http://www.nongmoproject.org/</a>                                   |
| Answers in Genesis                                               | Pro Creationism Teaching               | <a href="https://answersingenesis.org">https://answersingenesis.org</a>                                     |
| National Center for Science Education                            | Pro Evolution Teaching                 | <a href="http://ncse.com/">http://ncse.com/</a>                                                             |

## References

- 1 Tukey, J. *Exploratory Data Analysis*. (Addison-Wesley, 1977).
